# Supplementary material for: Dense active matter model of motion patterns in confluent cell monolayers
Source: PubMed Central journal article supplement (PMC7075903; doi:10.1038/s41467-020-15164-5), 2020-03-16
Supplement: 41467_2020_15164_MOESM12_ESM.pdf [file 41467_2020_15164_MOESM12_ESM.pdf]

Title: Supplementary Movie 1:

Particle model simulation at  $T_{eff} = 0.05$  and correlation time  $\tau = 200$ . Arrows are velocity vectors, colored by velocity magnitude. This simulation is a slow liquid. Other parameters are  $\phi = 1, k = 1, \sigma = 1, N = 3183$ .

Title: Supplementary Movie 2:

Description: Vertex model simulation at  $T_{eff} = 0.005$  and correlation time  $\tau = 200$ . This simulation is a solid. Other parameters are  $K = 1, \Gamma = 1, A_0 = \pi, \bar{p}_0 = 3.6, N = 3183$ .

Title: Supplementary Movie 3:

Description: Particle model simulation at  $T_{eff} = 0.05$  and correlation time  $\tau = 2$ , showing the near-thermal limit. This simulation is a liquid. Other parameters are  $\phi = 1, k = 1, \sigma = 1, N = 3183$ .

Title: Supplementary Movie 4:

Description: Vertex model simulation at  $T_{eff} = 0.1$  and correlation time  $\tau = 2000$ , showing the limit where the correlation length reaches system size. This simulation is nominally liquid, but there are no local rearrangements. Other parameters are  $K = 1, \Gamma = 1, A_0 = \pi, \bar{p}_0 = 3.6, N = 3183$ .

Title: Supplementary Movie 5:

Description: Human corneal epithelial cells imaged using phase contrast, experiment 7 in the main text. The field of view is  $867\mu\text{m} \times 662\mu\text{m}$ , and the cells were imaged over 48 hours. White cells have been extruded out of the sheet.

Title: Supplementary Movie 6:

Description: PIV analysis of experiment 7, arrows are proportional to velocity field and are colored by velocity magnitude.

Title: Supplementary Movie 7

Description: Matched soft disk simulation for the experiments, arrows are the velocity field and are colored by velocity magnitude (in units of  $\mu\text{m}/h$ ). Parameters are  $\phi = 0.95, \frac{k}{\zeta} = 55h^{-1}, \tau = 2.5h, v_0 = \frac{90 \mu\text{m}}{h}, N = 1400$ .

Title: Supplementary Movie 8

Description: Same as S7, but with particles colored according to velocity magnitude, to help visualise particle motion.

Title: Supplementary Movie 9

Matched soft disk simulation for the experiments, with added divisions, with particles colored by velocity magnitude. Parameters are  $\frac{k}{\zeta} = 55h^{-1}, \tau = 2.5h, v_0 = \frac{90 \mu\text{m}}{h}$ , and additionally death rate  $\frac{1}{a} = 48h$ , relative death / division rate  $\frac{a}{d} = 0.05$ , see ref. [56] for details.

Title: Supplementary Movie 10

Matched vertex model simulation for the experiments. Cells are colored according to their area (in  $\mu\text{m}^2$ ). Parameters are  $A_0 = 380 \mu\text{m}^2, \frac{\Gamma}{\zeta} = 55h^{-1}, \frac{KA_0}{\zeta} = 55 h^{-1}, \tau = 2.5h, v_0 = \frac{90 \mu\text{m}}{h}, N = 1400$ .
